# Supplementary material
Source: PubMed Central journal article supplement (PMC6625921)

A

| Accession | Description | # unique peptides | # total peptides | # unique peptides + hemin | # total peptides + hemin |
|-----------|-------------|-------------------|------------------|---------------------------|--------------------------|
| O14867    | Bach1       | 92                | 915              | 99                        | 1223                     |
| Q8NEZ5    | Fbxo22      | 16                | 37               | 24                        | 53                       |
| E5RJR5    | Skp1        | 9                 | 21               | 12                        | 33                       |
| Q9UF56    | Fbxl17      | 13                | 14               | 10                        | 11                       |
| Q9UK99    | Fbxo3       | 5                 | 5                | 10                        | 12                       |
| Q5QP82    | Dcaf10      | 4                 | 4                | 2                         | 2                        |
| P61962    | Dcaf7       | 3                 | 3                | 0                         | 0                        |
| Q86SY2    | Dcaf4       | 2                 | 3                | 0                         | 0                        |
| Q5TAQ9    | Dcaf8       | 2                 | 2                | 3                         | 3                        |
| Q9NXK8    | Fbxl12      | 2                 | 2                | 2                         | 2                        |
| Q9UKT4    | Fbxo5       | 2                 | 2                | 2                         | 2                        |

B

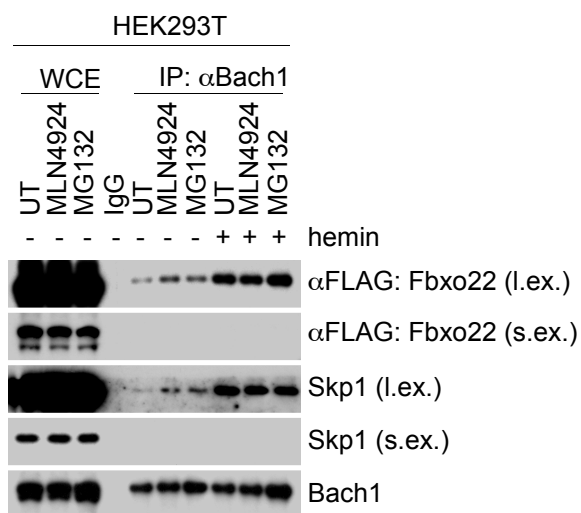

F

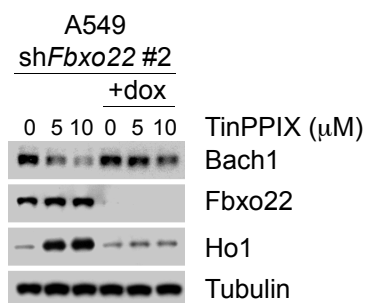

H

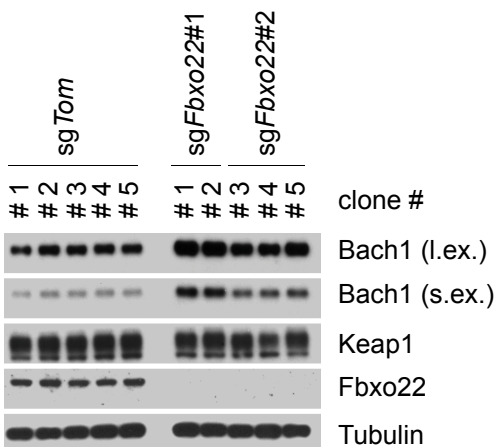

C

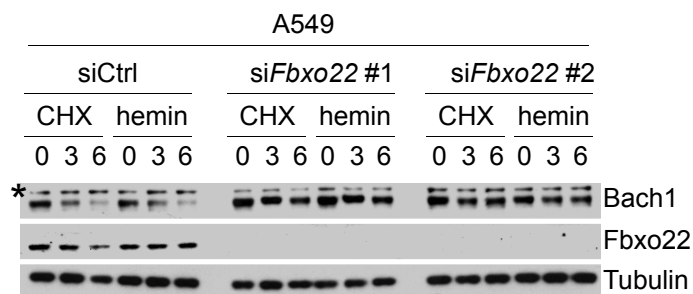

D

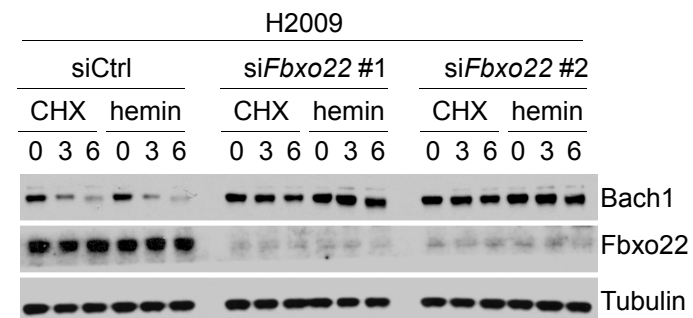

E

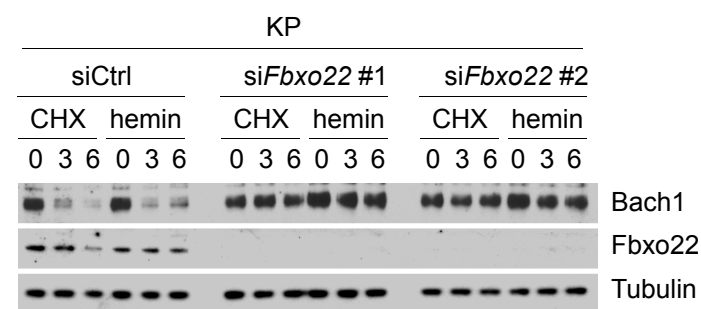

G

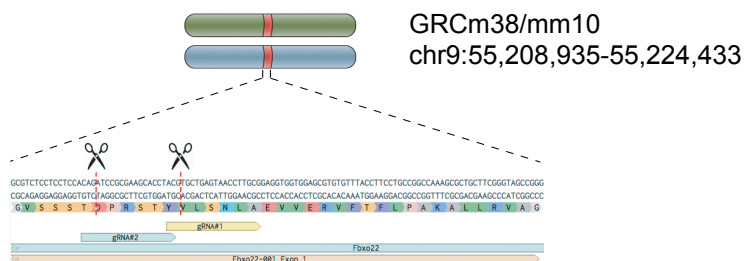

I

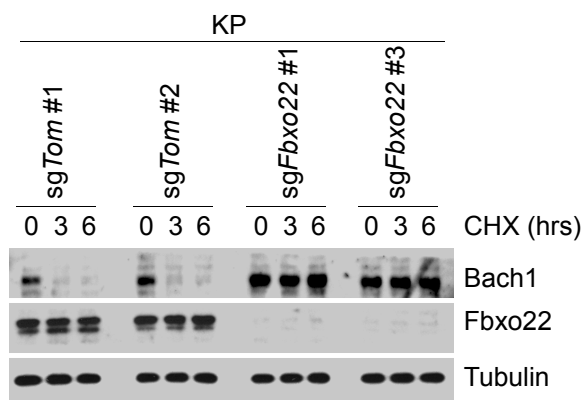

Supplement: NIHMS1531199-supplement-3.pdf [file NIHMS1531199-supplement-3.pdf]
