# Supplementary material
Source: PubMed Central journal article supplement (PMC6625921)
Supplement: NIHMS1531199-supplement-10.pdf [file NIHMS1531199-supplement-10.pdf]

**Table S1. GSEA report of HCMDB gene-set enrichment in KPK v. KP cells, Related to Figure 1.**

| NAME  | SIZE | ES   | NES  | NOM p-val | FDR q-val | FWER p-val | RANK AT MAX | LEADING EDGE                   |
|-------|------|------|------|-----------|-----------|------------|-------------|--------------------------------|
| HCMDB | 1826 | 0.35 | 1.73 | 0.00      | 0.08      | 0.00       | 2515.00     | tags=21%, list=15%, signal=22% |

**Table S2. GSEA report of C3:TFT gene-set (MSigDB V6.2) enrichment in KPK v. KP cells, Related to Figure 1.**

| NAME                    | SIZE | ES   | NES  | NOM p-val | FDR q-val | FWER p-val | RANK AT MAX | LEADING EDGE                   |
|-------------------------|------|------|------|-----------|-----------|------------|-------------|--------------------------------|
| BACH1_01                | 243  | 0.37 | 1.74 | 0.00      | 0.11      | 0.10       | 2075        | tags=18%, list=12%, signal=20% |
| ELK1_01                 | 244  | 0.28 | 1.73 | 0.00      | 0.08      | 0.14       | 2412        | tags=13%, list=14%, signal=15% |
| TNCATNTCCYR_UNKNOWN     | 120  | 0.30 | 1.71 | 0.00      | 0.07      | 0.19       | 3356        | tags=22%, list=20%, signal=27% |
| AP1_Q4                  | 250  | 0.38 | 1.65 | 0.00      | 0.17      | 0.29       | 2790        | tags=21%, list=16%, signal=25% |
| SF1_Q6                  | 231  | 0.34 | 1.64 | 0.00      | 0.15      | 0.29       | 1986        | tags=15%, list=12%, signal=17% |
| HNF4_Q6                 | 242  | 0.39 | 1.58 | 0.00      | 0.26      | 0.35       | 3095        | tags=27%, list=18%, signal=33% |
| NRF2_Q4                 | 229  | 0.37 | 1.57 | 0.00      | 0.27      | 0.35       | 3369        | tags=24%, list=20%, signal=30% |
| AP1_Q6                  | 236  | 0.36 | 1.55 | 0.00      | 0.30      | 0.41       | 2854        | tags=22%, list=17%, signal=27% |
| RGTTAMWNATT_HNF1_01     | 67   | 0.51 | 1.54 | 0.00      | 0.28      | 0.41       | 1546        | tags=28%, list=9%, signal=31%  |
| PEA3_Q6                 | 237  | 0.41 | 1.53 | 0.00      | 0.30      | 0.45       | 3326        | tags=30%, list=20%, signal=37% |
| TGASTMAGC_NFE2_01       | 173  | 0.36 | 1.53 | 0.00      | 0.28      | 0.45       | 2422        | tags=18%, list=14%, signal=21% |
| NFE2_01                 | 245  | 0.38 | 1.50 | 0.00      | 0.35      | 0.56       | 3904        | tags=29%, list=23%, signal=37% |
| TGANNYRGCA_TCF11MAFG_01 | 270  | 0.33 | 1.50 | 0.00      | 0.33      | 0.56       | 2263        | tags=17%, list=13%, signal=19% |
| BACH2_01                | 247  | 0.32 | 1.50 | 0.00      | 0.32      | 0.56       | 1743        | tags=14%, list=10%, signal=15% |
| TTCNRGNNTTC_HSF_Q6      | 138  | 0.33 | 1.50 | 0.00      | 0.30      | 0.56       | 1813        | tags=14%, list=11%, signal=15% |
| AP1_Q6_01               | 246  | 0.36 | 1.49 | 0.00      | 0.29      | 0.56       | 1794        | tags=15%, list=11%, signal=17% |
| NFKAPPAB_01             | 238  | 0.38 | 1.48 | 0.00      | 0.29      | 0.60       | 2107        | tags=21%, list=12%, signal=24% |
| AP1FJ_Q2                | 248  | 0.37 | 1.48 | 0.00      | 0.28      | 0.60       | 2790        | tags=21%, list=16%, signal=24% |
| AP1_01                  | 238  | 0.34 | 1.47 | 0.00      | 0.29      | 0.60       | 2637        | tags=21%, list=16%, signal=24% |
| TEL2_Q6                 | 218  | 0.23 | 1.46 | 0.00      | 0.29      | 0.60       | 2931        | tags=17%, list=17%, signal=20% |
| WCAANNYCAG_UNKNOWN      | 229  | 0.26 | 1.46 | 0.00      | 0.28      | 0.60       | 2837        | tags=19%, list=17%, signal=22% |
| CCAWYNGGAAR_UNKNOWN     | 126  | 0.29 | 1.45 | 0.00      | 0.29      | 0.60       | 2850        | tags=20%, list=17%, signal=24% |
| PPAR_DR1_Q2             | 240  | 0.28 | 1.43 | 0.00      | 0.32      | 0.60       | 2412        | tags=15%, list=14%, signal=18% |
| NFKB_C                  | 250  | 0.33 | 1.42 | 0.00      | 0.36      | 0.66       | 2707        | tags=22%, list=16%, signal=26% |
| CEBPB_02                | 240  | 0.35 | 1.42 | 0.09      | 0.35      | 0.66       | 3208        | tags=28%, list=19%, signal=34% |
| USF2_Q6                 | 234  | 0.28 | 1.41 | 0.00      | 0.35      | 0.66       | 4351        | tags=29%, list=26%, signal=38% |
| RGAGGAARY_PU1_Q6        | 466  | 0.31 | 1.41 | 0.09      | 0.36      | 0.71       | 3144        | tags=26%, list=19%, signal=30% |
| HNF4_01                 | 246  | 0.35 | 1.40 | 0.00      | 0.35      | 0.71       | 2319        | tags=18%, list=14%, signal=20% |
| TGACCTTG_SF1_Q6         | 222  | 0.32 | 1.40 | 0.10      | 0.35      | 0.71       | 2901        | tags=21%, list=17%, signal=25% |
| STTCRNTT_IRF_Q6         | 178  | 0.32 | 1.39 | 0.00      | 0.37      | 0.75       | 2624        | tags=22%, list=16%, signal=26% |
| HNF4_DR1_Q3             | 238  | 0.29 | 1.38 | 0.00      | 0.36      | 0.75       | 3354        | tags=21%, list=20%, signal=26% |
| NFKAPPAB65_01           | 227  | 0.33 | 1.38 | 0.10      | 0.36      | 0.75       | 2027        | tags=18%, list=12%, signal=20% |
| ETS_Q4                  | 234  | 0.25 | 1.37 | 0.00      | 0.38      | 0.75       | 3249        | tags=22%, list=19%, signal=27% |
| HNF1_01                 | 221  | 0.41 | 1.37 | 0.00      | 0.37      | 0.75       | 2708        | tags=29%, list=16%, signal=33% |
| YGACNNYACAR_UNKNOWN     | 86   | 0.39 | 1.36 | 0.00      | 0.38      | 0.79       | 3157        | tags=28%, list=19%, signal=34% |
| AP1_Q4_01               | 243  | 0.31 | 1.36 | 0.10      | 0.37      | 0.79       | 2500        | tags=21%, list=15%, signal=24% |
| HNF1_Q6                 | 231  | 0.40 | 1.36 | 0.00      | 0.36      | 0.79       | 2141        | tags=23%, list=13%, signal=26% |
| ARNT_01                 | 238  | 0.23 | 1.36 | 0.00      | 0.36      | 0.79       | 3459        | tags=18%, list=20%, signal=22% |
| PPARA_01                | 34   | 0.44 | 1.35 | 0.00      | 0.36      | 0.79       | 1630        | tags=18%, list=10%, signal=19% |
| TTGCWCAAY_CEBPB_02      | 59   | 0.41 | 1.35 | 0.19      | 0.36      | 0.79       | 3210        | tags=32%, list=19%, signal=40% |
| NFKB_Q6_01              | 219  | 0.36 | 1.34 | 0.00      | 0.36      | 0.79       | 1992        | tags=18%, list=12%, signal=20% |
| AP1_C                   | 255  | 0.33 | 1.34 | 0.00      | 0.36      | 0.79       | 2075        | tags=17%, list=12%, signal=19% |
| LMO2COM_01              | 237  | 0.33 | 1.34 | 0.10      | 0.35      | 0.79       | 2368        | tags=19%, list=14%, signal=21% |
| PPARA_02                | 118  | 0.33 | 1.34 | 0.20      | 0.35      | 0.79       | 4325        | tags=32%, list=26%, signal=43% |
| MEIS1_01                | 228  | 0.33 | 1.33 | 0.09      | 0.36      | 0.79       | 2730        | tags=20%, list=16%, signal=23% |
| TGGNNNNNKCCAR_UNKNOWN   | 386  | 0.33 | 1.33 | 0.10      | 0.36      | 0.79       | 3308        | tags=28%, list=20%, signal=34% |
| CREL_01                 | 247  | 0.31 | 1.33 | 0.09      | 0.35      | 0.79       | 1882        | tags=16%, list=11%, signal=18% |
| AREB6_03                | 237  | 0.32 | 1.33 | 0.10      | 0.36      | 0.79       | 2019        | tags=18%, list=12%, signal=20% |
| STAT1_03                | 223  | 0.27 | 1.32 | 0.09      | 0.36      | 0.85       | 2568        | tags=16%, list=15%, signal=18% |
| AREB6_02                | 232  | 0.36 | 1.32 | 0.09      | 0.37      | 0.85       | 2792        | tags=25%, list=16%, signal=29% |
| WGGAATGY_TEF1_Q6        | 337  | 0.31 | 1.31 | 0.00      | 0.37      | 0.85       | 2856        | tags=23%, list=17%, signal=27% |
| RTTTNNNYTGGM_UNKNOWN    | 144  | 0.33 | 1.30 | 0.09      | 0.37      | 0.85       | 2100        | tags=24%, list=12%, signal=27% |
| NF1_Q6                  | 243  | 0.29 | 1.30 | 0.09      | 0.37      | 0.85       | 2195        | tags=18%, list=13%, signal=21% |
| PAX2_02                 | 236  | 0.34 | 1.30 | 0.09      | 0.36      | 0.85       | 3308        | tags=26%, list=20%, signal=32% |
| TCF11MAFG_01            | 189  | 0.34 | 1.30 | 0.09      | 0.36      | 0.85       | 2188        | tags=16%, list=13%, signal=18% |
| STAT5A_02               | 131  | 0.33 | 1.30 | 0.09      | 0.35      | 0.85       | 2801        | tags=23%, list=17%, signal=27% |
| P300_01                 | 229  | 0.28 | 1.30 | 0.09      | 0.35      | 0.85       | 2144        | tags=16%, list=13%, signal=18% |
| AP1_Q2                  | 242  | 0.34 | 1.30 | 0.00      | 0.35      | 0.85       | 2790        | tags=21%, list=16%, signal=25% |
| YKACATTT_UNKNOWN        | 253  | 0.31 | 1.30 | 0.09      | 0.35      | 0.85       | 3492        | tags=29%, list=21%, signal=36% |

**Table S4. GSEA report of Bach1 signature gene-set enrichment in KP siFbxo22 v. KP siCtrl cells, Related to Figure 4.**

| NAME                            | GS<br> follow link to MSigDB    | SIZE | ES   | NES  | NOM p-val | FDR q-val | FWER p-val | RANK AT MAX | LEADING EDGE                   |
|---------------------------------|---------------------------------|------|------|------|-----------|-----------|------------|-------------|--------------------------------|
| GSEA_BACH1_integrated_signature | GSEA_BACH1_integrated_signature | 287  | 0.43 | 1.58 | 0.00      | 0.09      | 0.00       | 3104.00     | tags=30%, list=17%, signal=35% |

**Table S6. Univariate and Multivariate Cox regression analyses for overall survival in the TCGA lung adenocarcinoma patient cohort, Related to Figure 7.**

**Description:** Results of univariate and multivariable Cox proportional hazards model on overall survival in the TCGA LUAD cohort (all patients).

| Characteristic                                      | Univariate      |                 | Multivariable    |                 | P <sub>interaction</sub> |
|-----------------------------------------------------|-----------------|-----------------|------------------|-----------------|--------------------------|
|                                                     | HR (95% CI)     | p               | HR (95% CI)      | p               |                          |
| Bach1 MSigDB signature (Strong vs weak correlation) | 1.25(1.07-1.46) | <b>0.00396</b>  | 1.39(1.13-1.70)  | <b>0.00127</b>  |                          |
| Gender (Male vs Female)                             | 1.08(0.80-1.46) | 0.602           | 1.11(0.78-1.58)  | 0.53141         |                          |
| Age (Years)                                         | 1.00(0.98-1.02) | 0.576           | 1.01(0.99-1.03)  | 0.11725         |                          |
| TNM Stage (Stage III/IV vs I/II)                    | 2.67(1.95-3.67) | <b>9.38E-10</b> | 1.18(0.75-1.86)  | 0.45328         |                          |
| T score (T3/T4 vs T1/T2)                            | 2.43(1.65-3.57) | <b>5.68E-06</b> | 1.87(1.19-2.94)  | <b>0.0061</b>   | 0.8934                   |
| N score (N1/N2 vs N0)                               | 2.52(1.86-3.41) | <b>1.96E-09</b> | 2.42(1.60-3.66)  | <b>2.56E-05</b> | 0.909                    |
| Smoking History (reformed > 15yrs vs non-smoker)    | 0.88(0.52-1.48) | 0.647           | 0.89(0.50-1.60)  | 0.72014         |                          |
| Smoking History (reformed <= 15yrs vs non-smoker)   | 1.09(0.68-1.76) | 0.693           | 1.17(0.68-2.01)  | 0.56499         |                          |
| Smoking History (current smoker vs non-smoker)      | 0.84(0.50-1.42) | 0.526           | 0.87(0.48-1.58)  | 0.66912         |                          |
| Tumor Purity (Frac. cancer nuclei)                  | 1.16(1.00-1.34) | <b>0.0376</b>   | 1.37(1.129-1.66) | <b>0.00141</b>  | 0.7051                   |

HR = Hazard ratio; CI = Confidence Interval; TNM Stage = Stage classification per Union for International Cancer Control (UICC);

T score = Primary tumor size/invasiveness; N score = Lymph node metastasis; Tumor Purity = From Campbell et al., Nat. Genet. 2016;48(6) using ABSOLUTE [Carter et al., Nat. Biotechnol. 2012;30(5)]

P<sub>interaction</sub> = p-value of interaction between Bach1 signature and other significant covariates (model comparison; likelihood ratio test)

**Table S7. Primer Sequences, Related to STAR methods section.**

**Description:** oligonucleotides table

| qPCR oligos |                        |                      |
|-------------|------------------------|----------------------|
| Gene Name   | Forward Sequence       | Reverse Sequence     |
| Bach1       | GAGCCTTGCCCGTATGCTTG   | TGGCAGCTTCACCTCACAGT |
| Hmox1       | ACAGAGGAACACAAAGACCAG  | GTGTCTGGGATGAGCTAGTG |
| Gapdh       | CTTTGTCAAGCTCATTTCCTGG | TCTTGCTCAGTGCCTTG    |

  

| CRISPR gRNA oligos |                           |                           |
|--------------------|---------------------------|---------------------------|
| gRNA Target        | Forward Sequence          | Reverse Sequence          |
| Fbxo22 gRNA#1      | CACCGCGTGCTGAGTAACCTTGCGG | AAACCCGCAAGTTACTCAGCACGC  |
| Fbxo22 gRNA#2      | CACCGGTGCTTCGCGGATCTGTGG  | AAACCCACAGATCCGCGAAGCACC  |
| Bach1 gRNA#1       | CACCGCCAGGACAGTCACATCACAC | AAACGTGTGATGTACTGTCTGGC   |
| Bach1 gRNA#2       | CACCGTCTGGCCTACGATTCTCGAG | AAACCTCGAGAATCGTAGGCCAGAC |
| Ho1 gRNA #1        | CACCGTCAGGACCTGACCCCTGAG  | AAACCTCAGGGGTCAGGTCCTGAC  |
| Ho1 gRNA #2        | CACCGCTGTGTGGCTGGCGTGCAA  | AAACTTGACAGCCAGCCACACAGC  |

\*G for U6 promoter transcription initiation  
\*Bpil (BbsI) overhang

  

| Genotyping primers     |                       |                      |
|------------------------|-----------------------|----------------------|
| Name                   | Forward Sequence      | Reverse Sequence     |
| Bach1 CRISPR Genotype  | CGGAGAGGAACGGAGCGC    | CCCGAAAGGACGGAAGGACG |
| Fbxo22 CRISPR Genotype | GGCGAGGAATGGAGCCGCGAG | CCCGGCTACCGAAGCAGCGC |

  

| siRNA sequences |                                |                      |
|-----------------|--------------------------------|----------------------|
| mRNA Target     | Cat.No.                        | Sequence             |
| Human FBXO22    | #1_DHARMACON, J-010812-06-0005 | GCACCUUCGUGUUGAGUAA  |
|                 | #2_DHARMACON, J-010812-07-0005 | GGUGGGAGCCAGUAAUUAU  |
|                 | #3_DHARMACON, J-010812-08-0005 | GUUCGCAUCUUACCACAUUA |
|                 | #4_DHARMACON, J-010812-09-0005 | GCUUAUGGAGGGAGUGUGU  |
| Mouse FBXO22    | #1_DHARMACON, J-055384-09-0005 | GUCAGCACUUUCAGCGAUA  |
|                 | #2_DHARMACON, J-055384-10-0005 | GGGAUCAGGUAGCAAUCGA  |
|                 | #3_DHARMACON, J-055384-11-0005 | GAAUUUAACACUCGAAAGA  |
|                 | #4_DHARMACON, J-055384-12-0005 | GGAGAUGUAAUGAGGUAAA  |

  

| Ultramers sequences |                                                                                                  |
|---------------------|--------------------------------------------------------------------------------------------------|
| mRNA Target         | Sequence                                                                                         |
| Mouse Bach1 #2      | TGCTGTTGACAGTGAGCGATCCACCTTGCTAGACTGTTATAGTGAAGCCACAGATGTATAACAGTCTAGACAAGGTGGAGTGCCTACTGCCTCGGA |
| Mouse Bach1 #4      | TGCTGTTGACAGTGAGCGATCCTAGAGTTCAAACCTAAGTGAAGCCACAGATGTATAGTTAGTTTGAACCTCTAGGAGTGCCTACTGCCTCGGA   |
| Mouse Fbxo22 #4     | TGCTGTTGACAGTGAGCGCTCCCTCAAATGAAGGAATAATAGTGAAGCCACAGATGTATTTTCTTCAATTTGAGGGAATGCCTACTGCCTCGGA   |
| Mouse Fbxo22 #5     | TGCTGTTGACAGTGAGCGAACCAGGAAGGTGGAGTTAATAGTGAAGCCACAGATGTATTAACCTCCACCTTCTGTTGCTACTGCCTCGGA       |
| Human BACH1 #3      | TGCTGTTGACAGTGAGCGCCACAACAGTGTAAACAGAAAATAGTGAAGCCACAGATGTATTTTCTGTTAACACTGTTGTTGCCTACTGCCTCGGA  |
| Human FBXO22 #1     | TGCTGTTGACAGTGAGCGCTCCAAAGAATTTAACATTAAGTGAAGCCACAGATGTATCTAATGTTAAATTTCTGGATTGCCTACTGCCTCGGA    |
| Human FBXO22 #5     | TGCTGTTGACAGTGAGCGAAGCAAGTAGTCAGCACTTTCATAGTGAAGCCACAGATGTATGAAAGTGTGACTACTGCTGCTACTGCCTCGGA     |
| shRNA control       | TGCTGTTGACAGTGAGCGCAGATTATACTAGAAGTTGATAGTGAAGCCACAGATGTATACAACCTTCTAGTATAATCTGTTGCCTACTGCCTCGGA |
