# Supplementary material
Source: PubMed Central journal article supplement (PMC6625921)

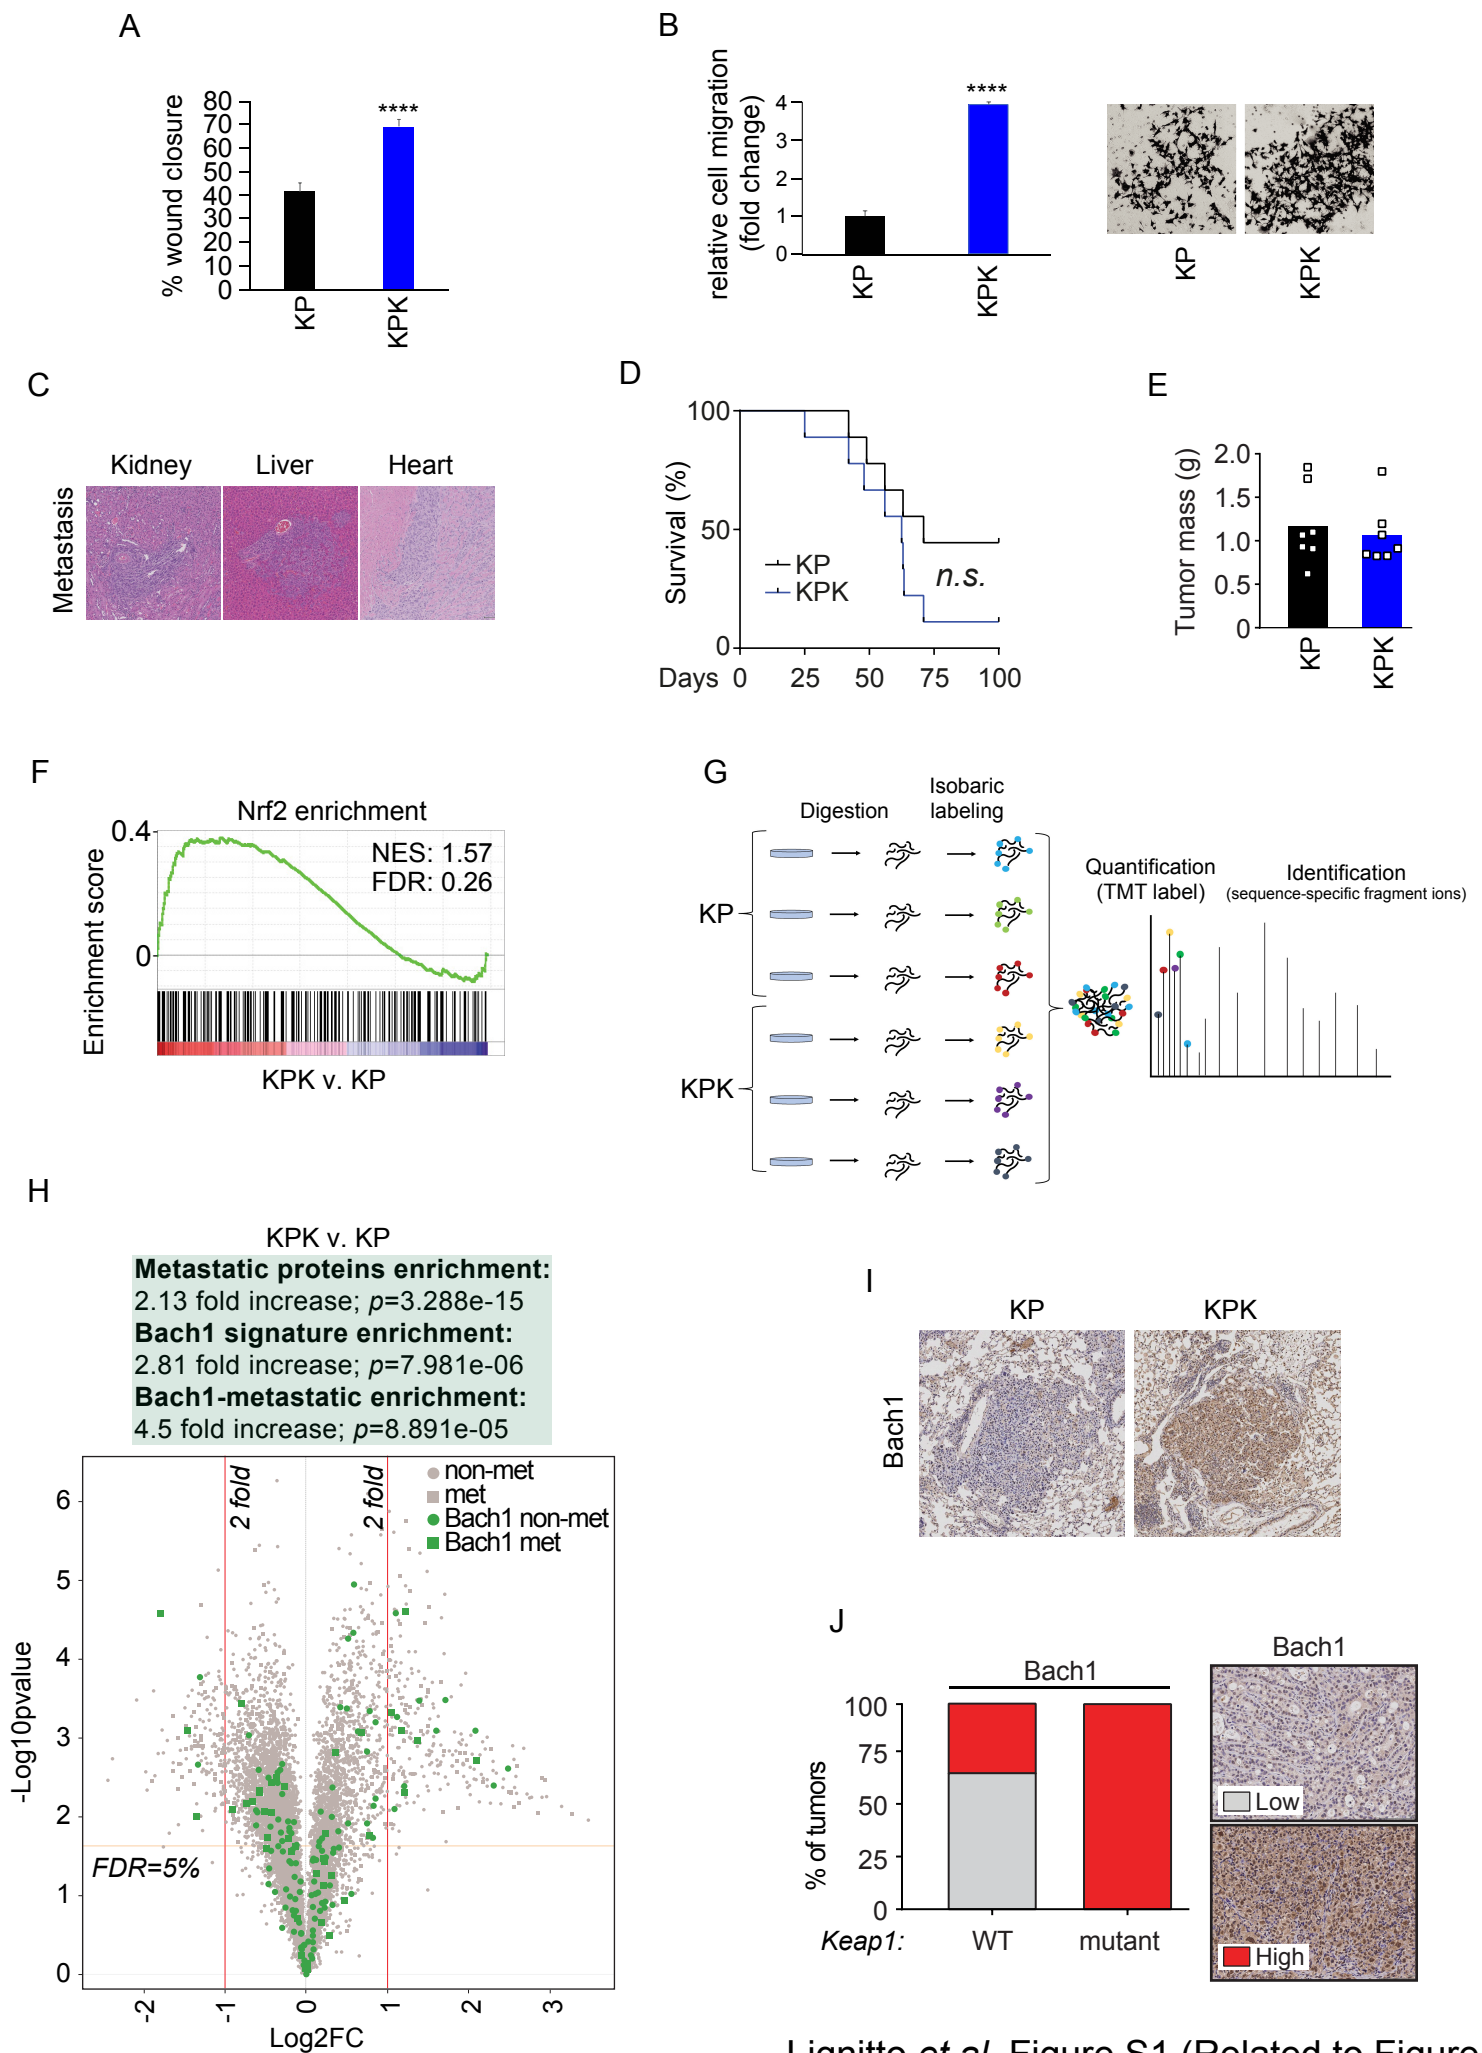

Supplement: NIHMS1531199-supplement-1.pdf [file NIHMS1531199-supplement-1.pdf]

A

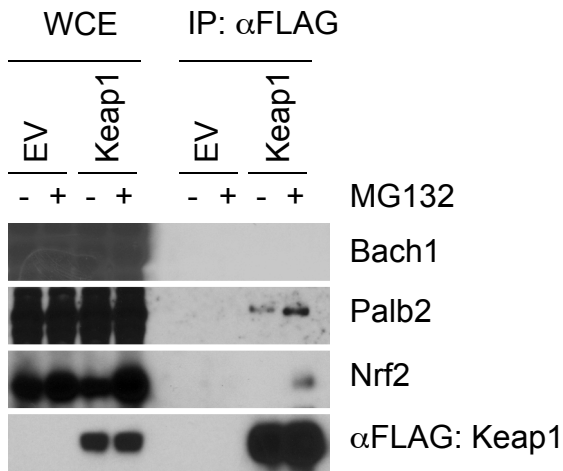

B

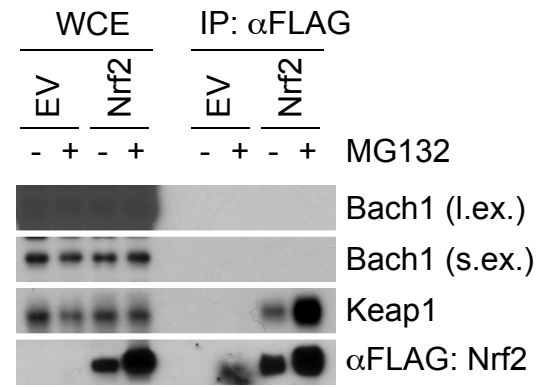

C

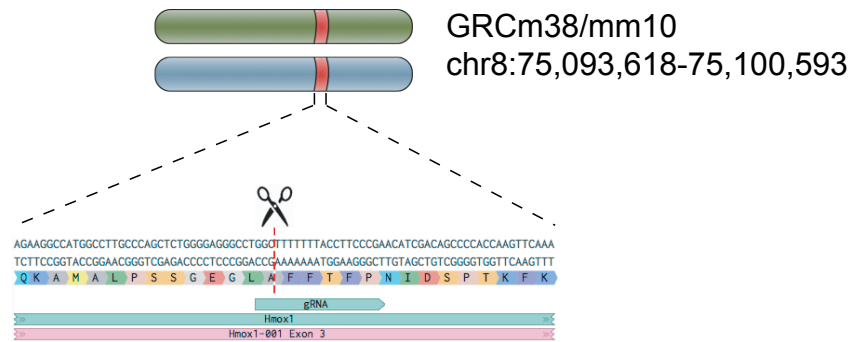

D

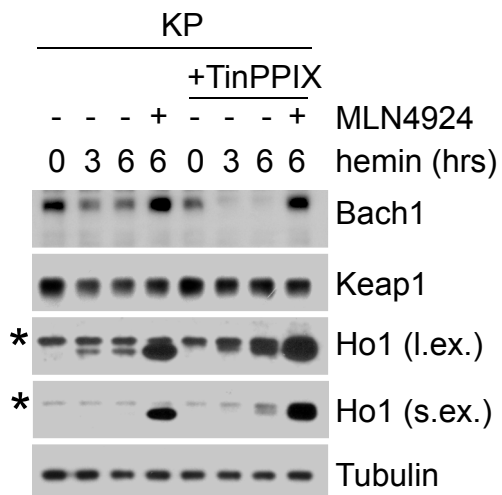

E

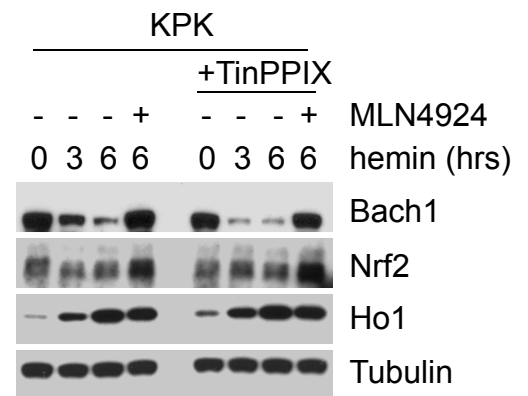

Supplement: NIHMS1531199-supplement-2.pdf [file NIHMS1531199-supplement-2.pdf]

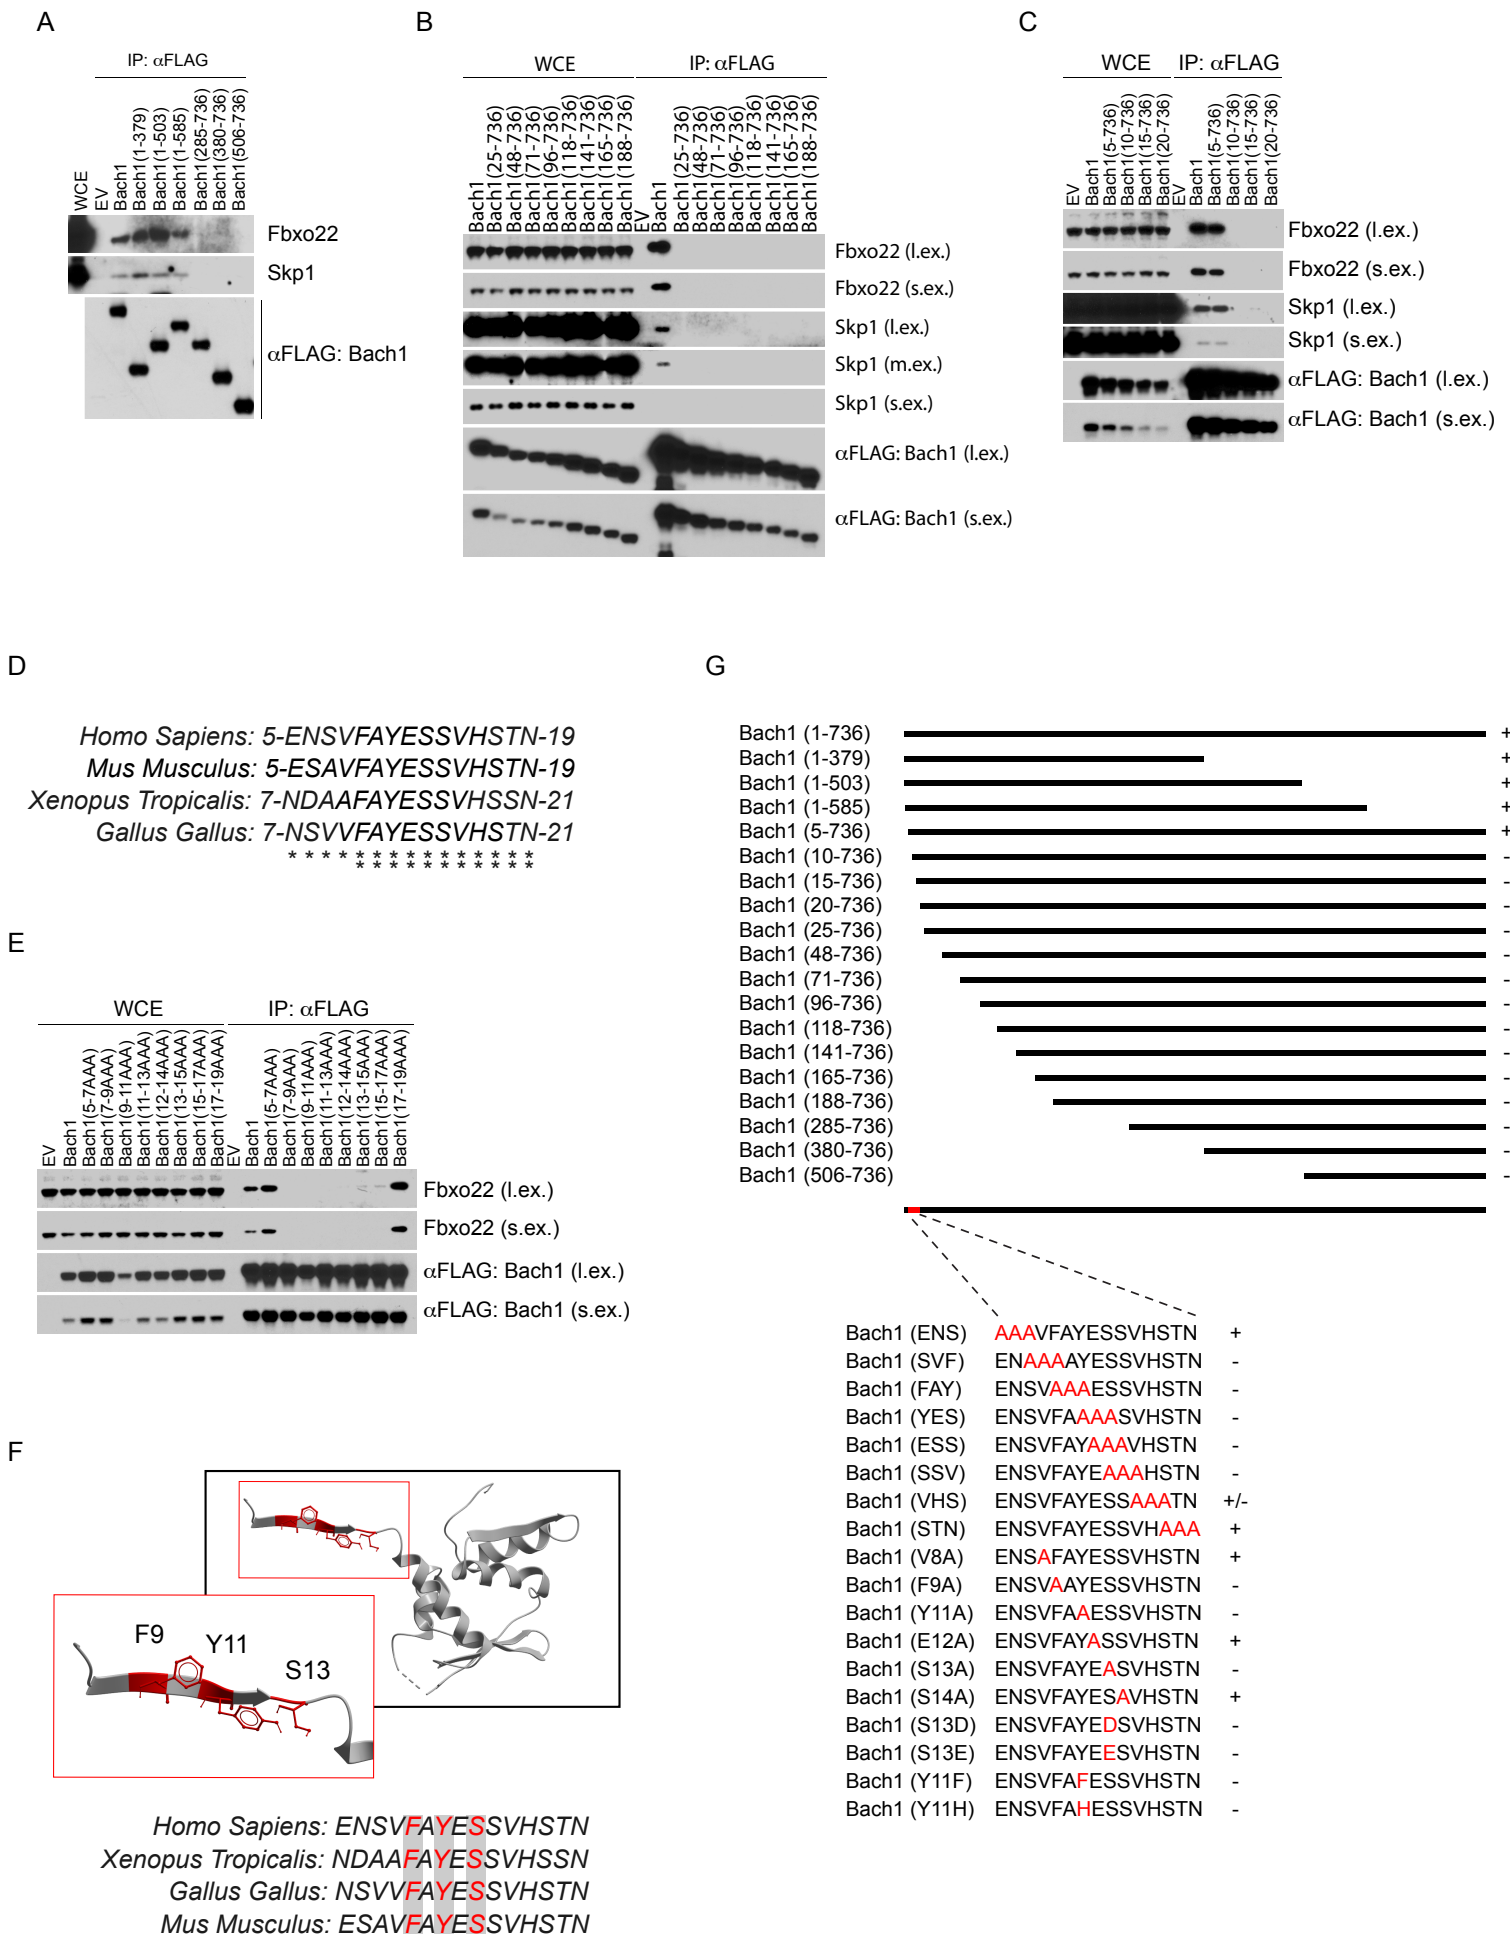

Supplement: NIHMS1531199-supplement-4.pdf [file NIHMS1531199-supplement-4.pdf]

A

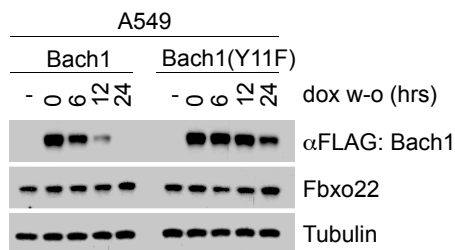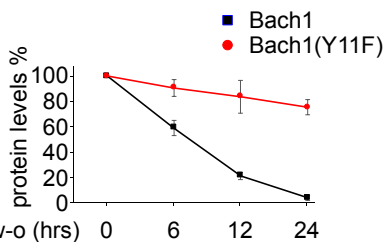

B

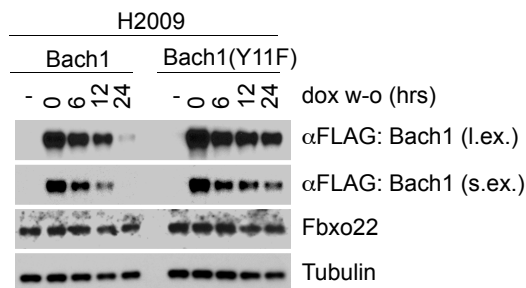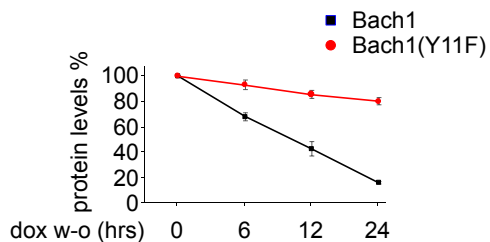

C

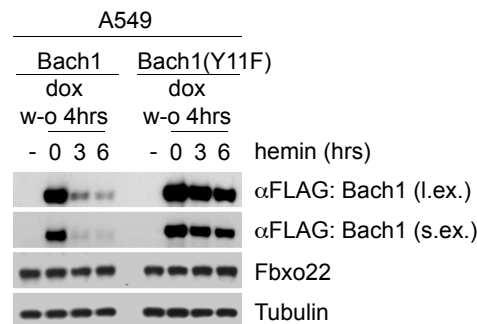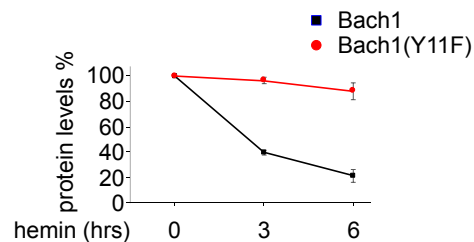

D

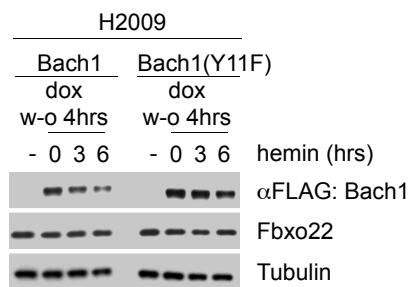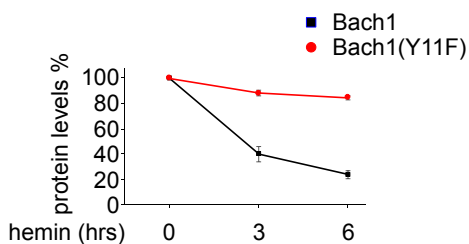

E

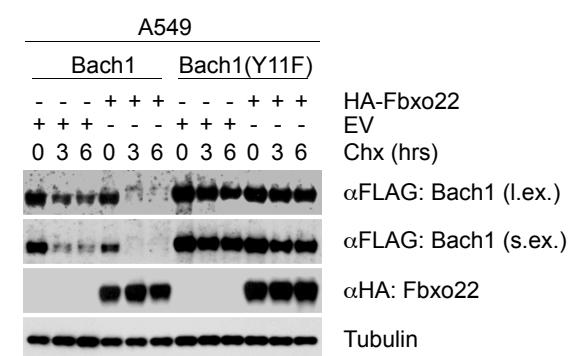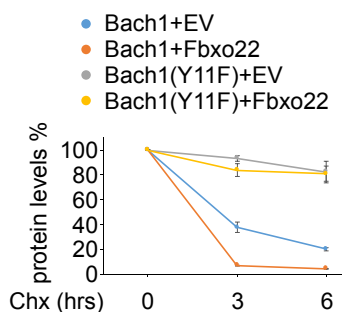

F

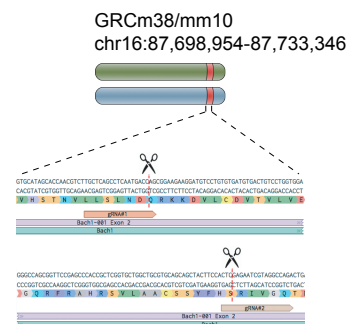

G

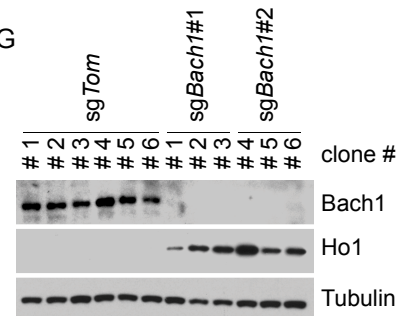

H

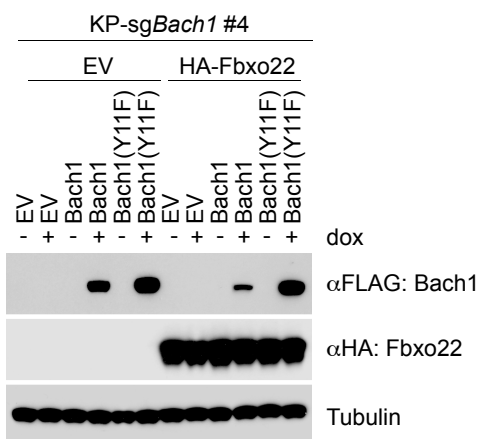

I

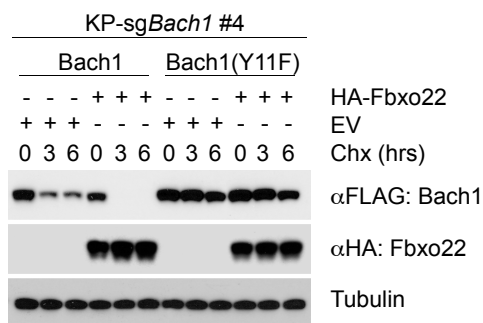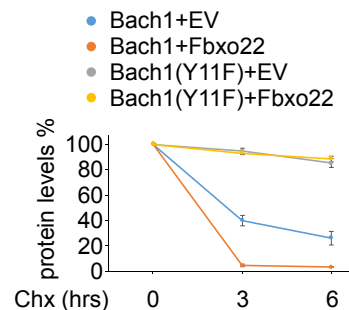

Supplement: NIHMS1531199-supplement-5.pdf [file NIHMS1531199-supplement-5.pdf]

A

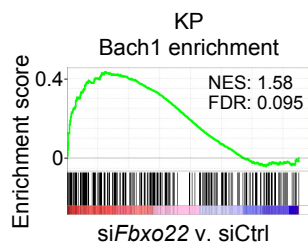

B

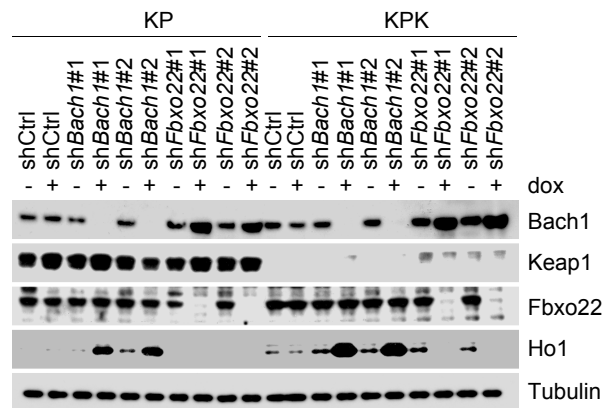

C

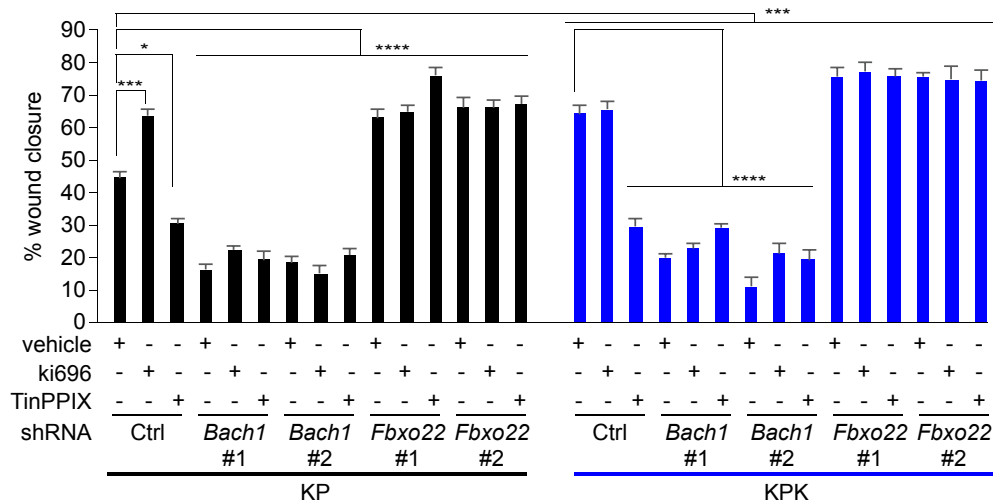

D

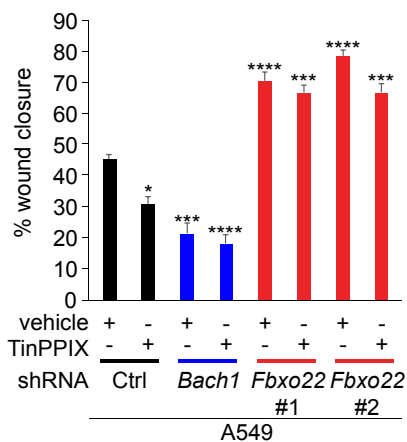

E

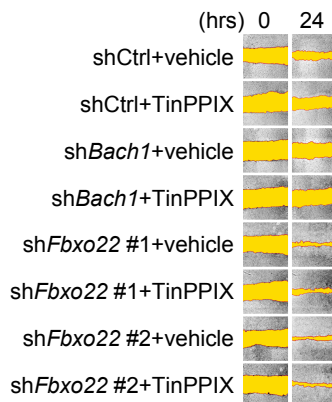

F

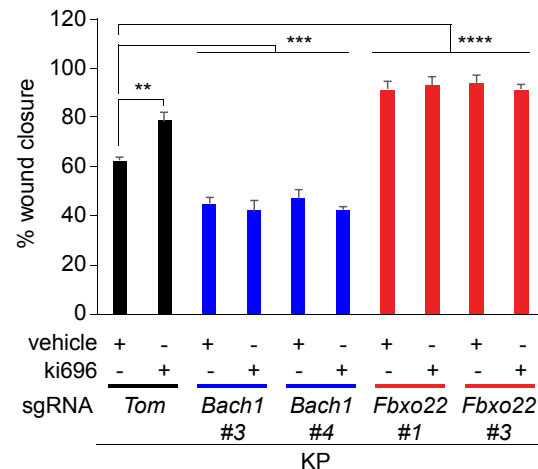

G

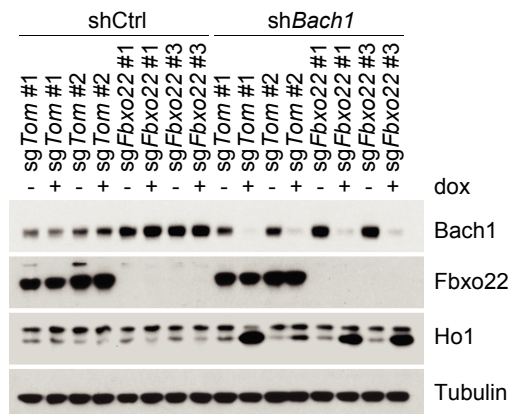

H

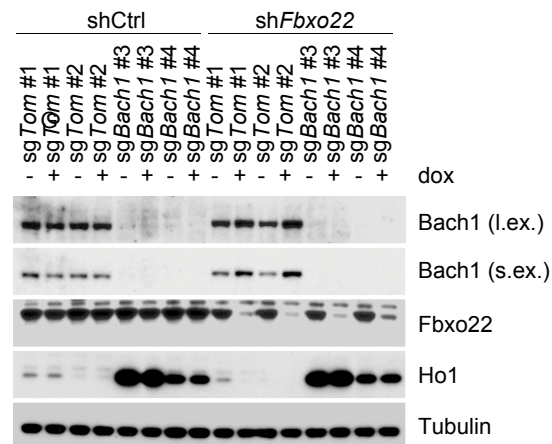

Supplement: NIHMS1531199-supplement-6.pdf [file NIHMS1531199-supplement-6.pdf]

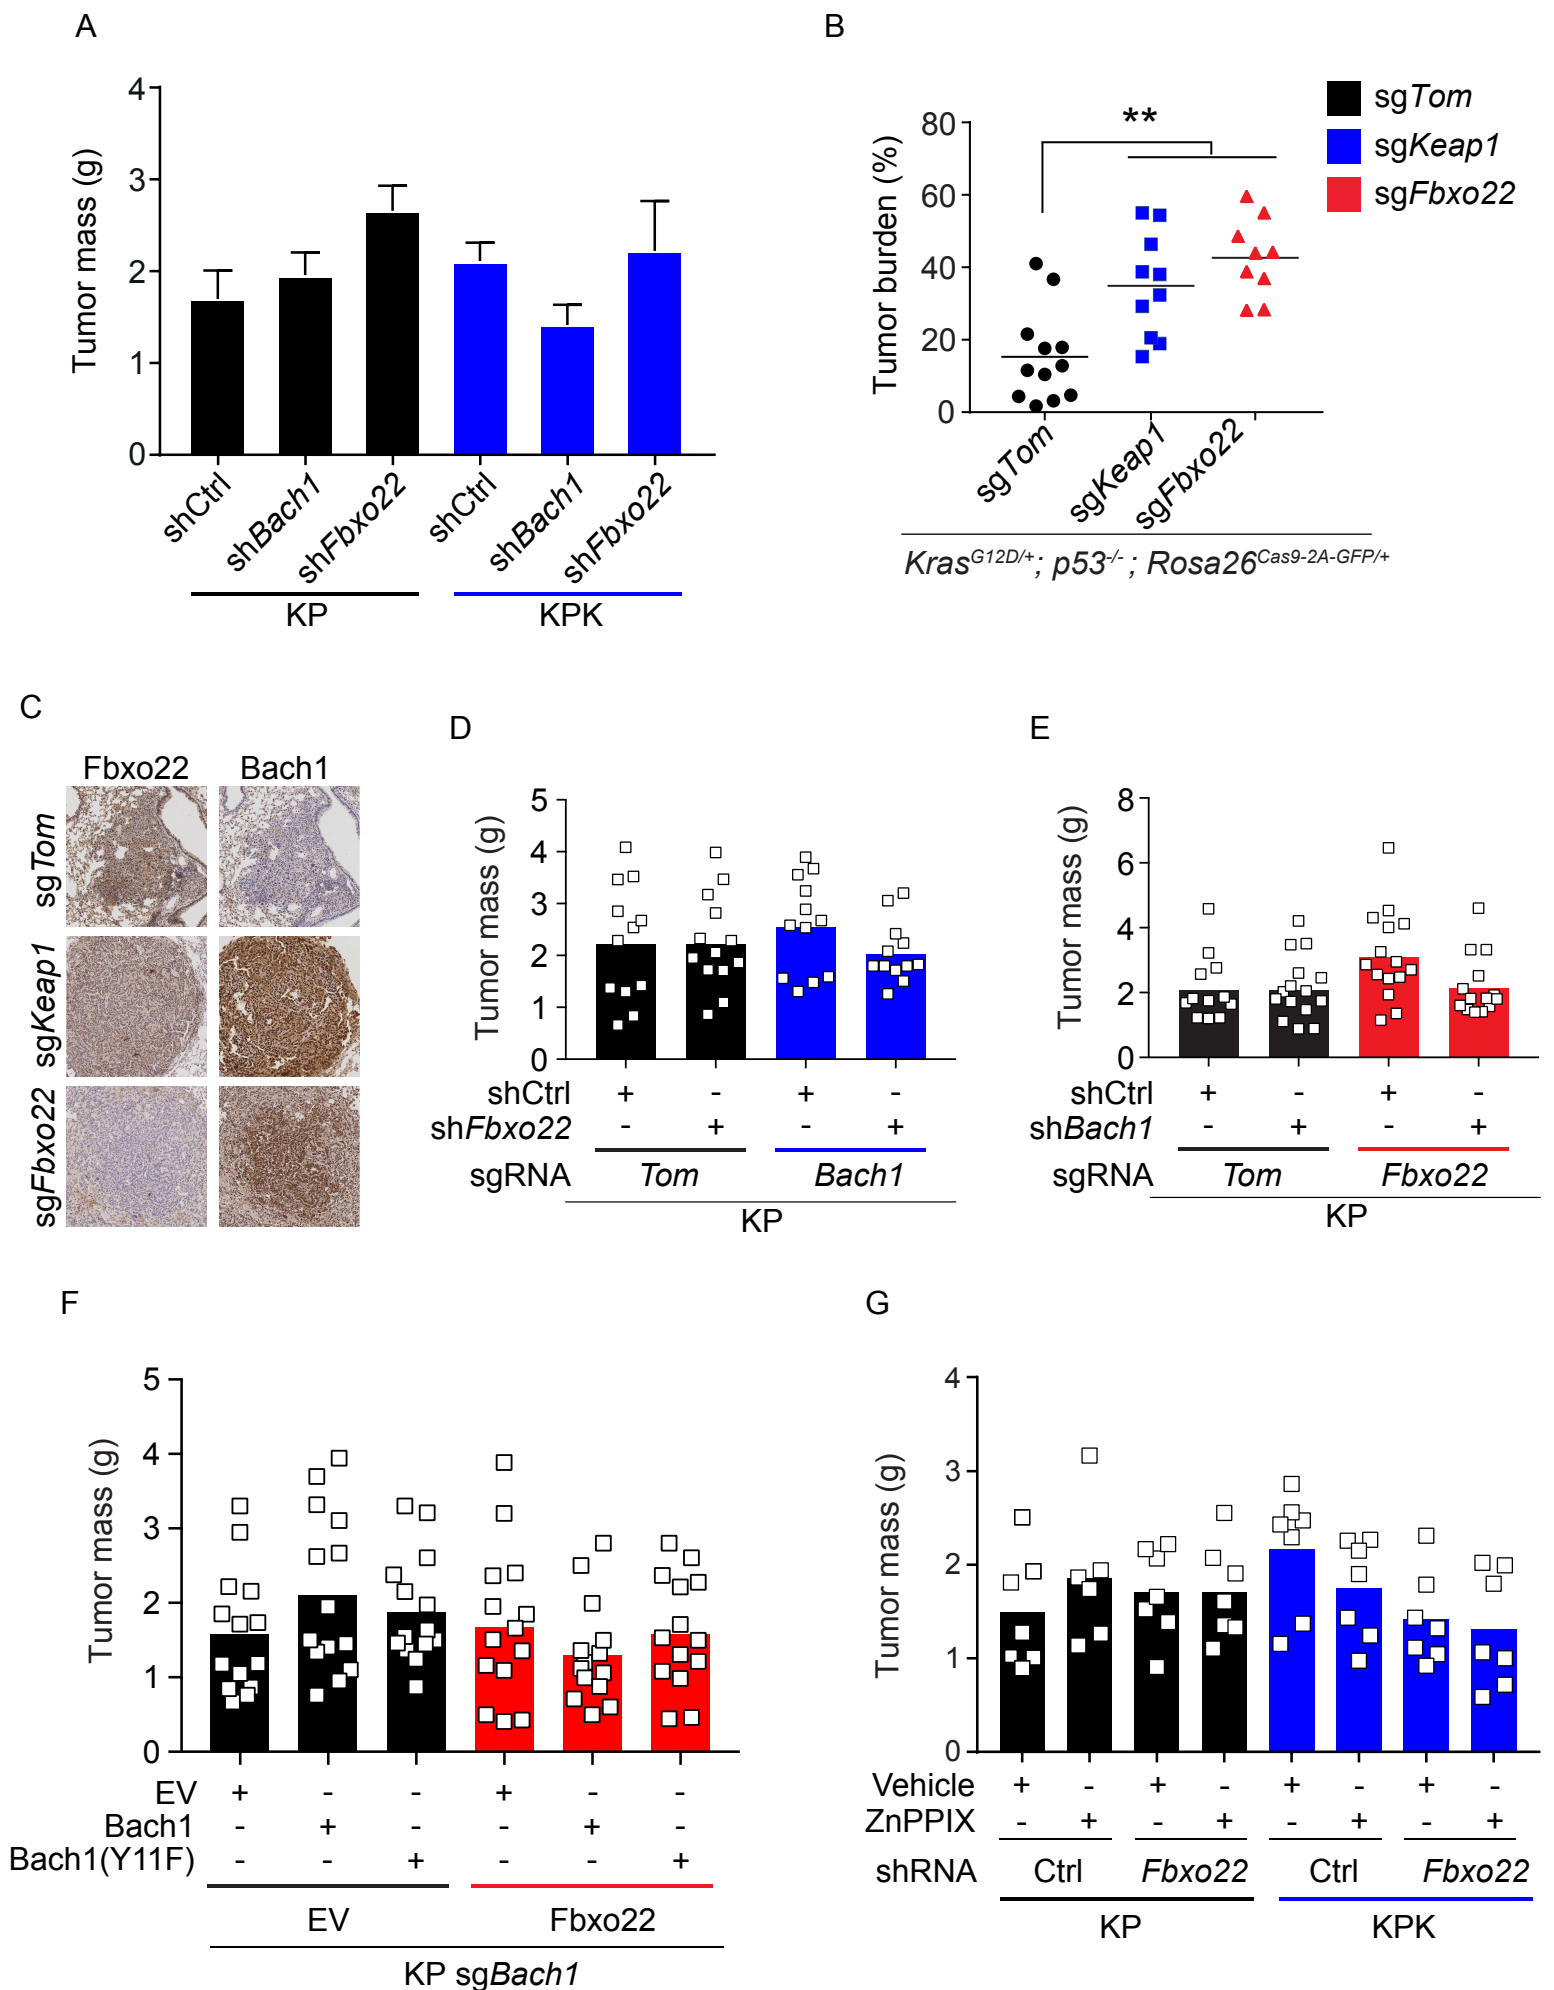

Supplement: NIHMS1531199-supplement-7.pdf [file NIHMS1531199-supplement-7.pdf]
